# Supplementary material
Source: publisher figshare collection journal article supplement (https://frontiersin.figshare.com/ndownloader/files/12418952)
Supplement: Supplementary file 1 [file 12418952]

## Sheet: Table S1
							Linear fit		Power fit
					Mass range (ng)		y = a + bx		y = ax^b
	Compounds	Retention time (min)	MW (g/mol)	MS Quan Ion	Min	Max	b	r2	a	b	r2
Volatile fatty acids	Acetic acid	18.455	60.05	43	27.71	2579.85	74815	0.9814	767814	0.7086	0.9793
	Propanoic acid	21.223	74.078	74	26.22	2432.43	54675	0.992	122139	0.9086	0.9916
	2-Methyl propanoic acid	22.308	88.11	43.1	2.56	2382.55	90136	0.99	239084	0.8864	0.9958
	Butanoic acid	23.993	88.11	60	25.43	2358.72	132194	0.9826	477981	0.846	0.9908
	3-Methyl butanoic acid	25.376	102.132	60	2.45	2272.72	136138	0.9787	692501	0.7987	0.9934
	Pentanoic acid	27.376	102.13	60	2.46	2285.01	116314	0.9639	649360	0.7941	0.9717
	4-Methyl pentanoic acid	29.009	116.158	57.1	ND	ND	105333	N/A	437505	0.8403	N/A
	Hexanoic acid	30.379	116.158	60	2.43	2260.44	126328	0.9763	381350	0.8624	0.959
	Heptanoic acid	32.997	130.185	60	ND	ND	105333	N/A	437505	0.8403	N/A
	Octanoic acid	34.86	144.21	60	2.41	2235.87	112062	0.9932	169812	0.9176	0.9034
	Nonanoic acid	36.343	158.23	60	ND	ND	105333	N/A	437505	0.8403	N/A
	Decanoic acid	37.622	172.26	60	ND	ND	105333	N/A	437505	0.8403	N/A
Esters	Ethyl hexanoate	10.325	144.21	88.1	2.5	2500	111616	0.9814	158126	0.9608	0.9977
	Hexyl hexanoate	23.369	200.322	117.1	2.5	2500	224095	0.9868	180890	1.0406	0.996
Alcohols	sec-Butyl alcohol	3.734	74.122	45.1	2.29	2129.87	308884	0.9693	2000000	0.758	0.9916
	iso-Butyl alcohol	5.316	74.122	43.1	N/A	N/A	126079	N/A	468331	0.9064	N/A
	n-Butanol	7.214	74.12	56.1	25	2500	75059	0.9746	69026	1.0126	0.9975
	iso-Pentyl alcohol	9.421	88.148	55.1	ND	ND	126079	N/A	468331	0.9064	N/A
	1-Pentanol	10.967	88.15	42.1	25	2500	50557	0.9852	89671	0.9288	0.9975
	1-Hexanol	14.746	102.174	56.1	2.5	2500	106631	0.9819	245036	0.8891	0.9955
	1-Heptanol	18.213	116.2	70.1	2.3	2135.06	96907	0.9859	161688	0.9413	0.9976
	2-Ethyl -1-hexanol	19.396	130.23	57.1	ND	ND	126079	N/A	468331	0.9064	N/A
	2-phenyl ethanol	31.715	122.16	91.1	ND	ND	126079	N/A	468331	0.9064	N/A
	3-Phenyl-1-propanol	34.386	136.194	117.1	ND	ND	126079	N/A	468331	0.9064	N/A
Phenolic & Aromatic	Phenol	33.833	94.1112	94	3.48	3431.7	191663	0.9667	2000000	0.7537	0.992
	p-Cresol	35.064	108.13	107	2.56	259.23	624668	0.9847	1000000	0.9005	0.9956
	Indole	39.446	117.15	117	3.56	3363.09	132223	0.9547	5000000	0.5695	0.9383
	Skatole	39.901	131.174	130	3.74	3528.15	150349	0.944	7000000	0.552	0.9382
	p-Xylene	6.872	106.16	91.1	ND	ND	227247	N/A	567467	0.9247	N/A
Sulfuric	Dimethyl disulfide	5.015	94.19	94	2.95	2743	106533	0.9867	253418	0.9135	0.9938
	Dimethyl trisulfide	15.222	126.26	126	ND	ND	106533	N/A	253418	0.9135	N/A
Aldehydes	Octanal	12.263	130.228	43.1	ND	ND	50161	N/A	214792	0.7457	N/A
	Nonanal	16.001	142.242	57.1	2.31	233.94	49926	0.9781	132171	0.7624	0.6451
	Decanal	19.679	158.28	57.1	2.32	2155.84	24341	0.9968	235895	0.6242	0.7329

## Sheet: Table S2
		CB								PB
VOC group	Compound	0		7		14		30		0		7		14		30
		Average	Std. Err	Average	Std. Err	Average	Std. Err	Average	Std. Err	Average	Std. Err	Average	Std. Err	Average	Std. Err	Average	Std. Err
Volatile fatty acids	Acetic acid	26.5384	12.3476	5.44426	0.891446	4.10964	0.949693	2.83978	0.364255	51.8743	25.1343	113.076	110.862	4.54786	1.06285	12.3215	4.10339
	Propanoic acid	22.7873	9.37326	8.14578	3.8266	10.3671	7.13001	1.7948	0.479471	68.829	28.7471	33.1689	27.6914	6.93999	1.2714	9.29911	3.36362
	2 MPA	1.53759	0.513079	2.25495	0.38884	7.43697	4.55907	0.734364	0.223835	2.84026	0.588648	6.31064	3.35236	6.84396	1.92828	4.60184	1.97783
	Butanoic acid	26.8411	9.85655	26.4953	15.876	51.0555	37.1726	4.28821	0.842439	100.475	40.7279	103.591	82.651	26.8794	4.31794	23.6135	8.65846
	3-Methyl butanoic acid	0.600268	0.186947	0.913117	0.0870636	2.90958	1.548	0.480671	0.248125	1.08918	0.410789	1.91052	0.681481	3.93435	1.3959	2.17735	0.853675
	Pentanoic acid acid	1.20328	0.415882	1.12797	0.525179	2.63517	1.62549	0.321213	0.230367	3.09402	0.957242	4.98124	4.38991	2.20726	0.543455	2.41437	0.923135
	4-methyl pentanoic acid	0.0968754	0.0463238	0.0640772	0.0416083	0.175995	0.174408	0.0140469	0.00490382	0.107332	0.0530739	0.170187	0.145343	0.0429678	0.0288672	0.132288	0.0612813
	Hexanoic acid	1.62216	0.404346	0.71277	0.414319	5.55287	2.2159	0.98368	0.251941	9.07172	4.85976	2.13714	1.23118	4.45686	0.505061	2.73105	0.794746
	heptanoic acid	0.00158619	8.85247e-20	0.0124777	0.0108915	0.0219528	0.0203667	0.00158619	0	0.00158619	8.85247e-20	0.00966159	0.0080754	0.013236	0.00700389	0.0120847	0.00739857
	Octanoic acid	0.145204	0.0413787	0.102271	0.0332313	0.277192	0.0491475	0.126284	0.0376889	0.131913	0.0443503	0.155481	0.0268082	0.27103	0.0607443	0.161173	0.012052
	Nonanoic acid	0.156683	0.0522626	0.110909	0.0269906	0.295724	0.0427135	0.167816	0.0385479	0.117776	0.0394524	0.122511	0.0252985	0.300848	0.0474359	0.142694	0.016571
	Decanoic acid	0.112456	0.0395589	0.113051	0.0252706	0.236747	0.0342658	0.165712	0.0203342	0.0930321	0.0258043	0.0967595	0.0256936	0.236612	0.0290288	0.124468	0.0157596
Esters	Ethyl hexanoate	0.00891694	0	0.345856	0.336939	0.00891694	0	0.00891694	0	0.233831	0.201279	0.0615876	0.0312734	0.386437	0.37752	0.0208143	0.0118973
	Hexyl hexanoate	0.0103231	7.08198e-19	0.274833	0.26451	0.0103231	0	0.0103231	0	0.188983	0.1572	0.0595027	0.0291104	0.304209	0.293886	0.0219373	0.0116143
Alcohols	n-Butanol	22.2526	4.80448	258.982	223.107	47.4039	26.0362	4.30142	2.73328	31.8024	5.06933	199.676	90.3554	55.3007	19.7597	59.6535	20.1339
	1-Pentanol	1.64662	0.386051	27.9527	16.3403	29.9388	22.2587	0.838846	0.240749	1.44004	0.258386	28.9499	8.22973	25.5429	10.0472	10.7494	3.19821
	1-Hexanol	0.309576	0.133979	8.65843	4.86065	44.6481	33.3714	1.57654	0.415861	0.538403	0.185487	9.03333	3.27736	47.1927	29.7015	19.4012	8.91017
	1-Heptanol	0.0116668	0.00221595	0.0823757	0.0456519	0.542003	0.367252	0.0465186	0.0287849	0.00945082	0	0.112804	0.0356831	0.933929	0.461636	0.732808	0.340542
	iso-Butyl alcohol	0.187505	0.0665049	1.95098	1.29811	0.308916	0.306747	0.25275	0.0947443	0.101128	0.0482001	0.553381	0.521341	0.102595	0.100426	1.24204	1.14006
	sec-Butyl alcohol	0.0969361	0.0431984	1.42212	1.10017	0.0211938	0.0210739	0.00373837	0.00361851	0.137331	0.108446	1.47232	1.01195	0.000119854	0	1.22161	0.880352
	iso-Pentyl alcohol	0.0973267	0.0526726	1.28491	0.664518	1.45623	1.45406	0.316268	0.314099	0.34547	0.0716929	2.40254	1.13473	1.29546	0.753752	0.64488	0.510878
	2-Ethyl -1-hexanol	0.339592	0.0278812	0.269139	0.0854156	0.394037	0.058367	0.437551	0.0998933	0.425689	0.034702	0.317237	0.0851686	0.395128	0.0648702	0.303199	0.063599
	2-Phenyl ethanol	0.0567604	0.00847441	0.915618	0.358226	0.90271	0.440483	0.128806	0.0432942	0.078103	0.0147658	0.643809	0.17678	0.93764	0.237031	0.547822	0.108608
	3-Phenyl-1-propanol	0.00216905	0	0.021176	0.00618426	0.048793	0.0259412	0.00532459	0.00153183	0.00216905	0	0.0338328	0.0195685	0.0603694	0.0199401	0.106487	0.0667409
Phenolic & aromatic	Phenol	0.177033	0.0149178	10.9945	5.04642	12.3438	6.25956	3.90891	0.630801	0.232182	0.0561005	7.95561	5.71577	10.7944	5.13023	9.27873	1.73959
	p-Cresol	4.74354	1.82206	12.9246	3.77173	14.4292	3.50774	3.96174	1.6895	3.208	0.875286	14.4274	6.30669	18.855	6.62812	21.8882	5.95414
	Indole	0.789379	0.275298	2.80086	1.01616	1.145	0.52971	0.178462	0.0643308	0.161757	0.0557903	2.64442	0.875417	1.80347	0.366404	2.04581	0.469176
	Skatole	0.00118432	0.00073725	0.436901	0.32981	0.254783	0.108865	0.046623	0.0235758	0.00187189	0.00122346	0.36281	0.320771	0.711329	0.50998	1.433	0.497185
	p-Xylene	0.050333	0.00723356	0.403811	0.240722	0.0615862	0.0158231	0.188206	0.144349	0.0440929	0.00237735	0.437645	0.257633	0.0461997	0.0102998	0.367667	0.194983
Sulfuric	Dimethyl disulfide	4.75601	1.07154	17.3556	6.06345	17.8166	11.156	1.99505	0.628482	1.49394	0.527062	11.2265	2.09245	15.0552	4.9431	6.91401	3.53183
	Dimethyl trisulfide	0.232795	0.0879936	3.48014	1.29705	4.76541	2.38974	0.348869	0.222918	0.0375137	0.0123936	1.89961	1.11866	1.85397	0.678206	1.36737	0.941337
Aldehydes	Octanal	0.0621579	0.0170372	0.0170226	0.0104425	0.112129	0.0347266	0.0606553	0.0211158	0.0840534	0.0200469	0.0230054	0.00828023	0.0391369	0.0115372	0.0399175	0.0130177
	Nonanal	0.892032	0.30146	0.28681	0.195941	1.41377	0.269583	1.05683	0.332102	1.02667	0.255412	0.234692	0.10305	0.682092	0.167906	0.537472	0.195657
	Decanal	0.08932	0.0433906	0.0159673	0.0132586	0.070247	0.0188097	0.100065	0.0345217	0.0771349	0.0298538	0.0089504	0.00514398	0.0339833	0.0113776	0.0339936	0.0120144
		CA								PA
VOC group	Compound	0		7		14		30		0		7		14		30
		Average	Std. Err	Average	Std. Err	Average	Std. Err	Average	Std. Err	Average	Std. Err	Average	Std. Err	Average	Std. Err	Average	Std. Err
Volatile fatty acids	Acetic acid	31.0355	13.3442	629.184	443.736	60.6911	39.6783	15.7507	8.68289	37.0868	19.3521	1886.43	793.49	612.755	319.818	21.3377	12.6712
	Propanoic acid	24.9447	11.4445	210.862	141.678	34.0844	16.5775	9.64719	5.22736	36.3254	8.69243	506.374	196.335	335.416	126.941	48.7194	29.0866
	2 MPA	1.40953	0.708534	14.0633	6.75014	8.07622	4.28774	1.53304	0.714708	1.65109	0.368011	20.8387	6.27102	30.3504	9.50948	22.0546	18.7335
	Butanoic acid	42.5339	23.3935	299.45	168.44	161.937	87.3685	17.2022	9.3296	48.3753	7.34177	704.401	111.828	567.211	112.836	220.41	138.064
	3-Methyl butanoic acid	0.591824	0.294874	4.395	1.80609	2.44103	0.984307	0.589277	0.20185	0.680592	0.211546	8.3966	3.01098	9.54658	2.99543	0.86401	0.504453
	Pentanoic acid acid	2.55672	1.73883	22.3622	12.6911	13.5485	9.78794	0.965514	0.429564	2.37062	0.58005	32.0124	10.574	21.5719	5.73003	23.7063	20.9026
	4-methyl pentanoic acid	0.132287	0.0783809	1.31027	0.910378	1.4299	1.05553	0.0696211	0.0423501	0.167984	0.0365099	1.90174	0.691857	1.93097	0.627118	0.403001	0.231814
	Hexanoic acid	4.92182	2.10908	11.1894	9.71434	39.9575	33.2856	2.53073	1.39022	3.83927	1.57701	35.8116	21.6962	40.473	19.9236	68.8712	62.5
	heptanoic acid	0.00629203	0.00470585	0.00158619	8.85247e-20	0.10688	0.097315	0.0321544	0.0263442	0.00414595	0.00255976	0.175962	0.0762878	0.145603	0.0739012	0.262451	0.255364
	Octanoic acid	0.16656	0.0348027	0.161901	0.0514363	0.479901	0.344745	0.317724	0.173701	0.162109	0.0529129	0.686143	0.227486	0.387428	0.135154	0.456964	0.325087
	Nonanoic acid	0.159009	0.0403819	0.174716	0.0410933	0.387847	0.266976	0.298746	0.143898	0.146792	0.0498976	0.409207	0.155145	0.293019	0.0693498	0.329567	0.210694
	Decanoic acid	0.1504	0.0514038	0.179856	0.0522314	0.315172	0.231776	0.287769	0.141294	0.12411	0.0509472	0.277699	0.13558	0.164239	0.0247038	0.183447	0.0825669
Esters	Ethyl hexanoate	0.0839243	0.0469213	0.77907	0.702387	6.98213	6.37663	0.051725	0.0428081	0.0492438	0.0403268	1.40748	0.855917	8.3595	7.23746	3.55333	2.90287
	Hexyl hexanoate	0.0768352	0.0413676	0.570529	0.498252	4.28565	3.82881	0.047737	0.0374139	0.0457114	0.0353883	1.02144	0.6079	5.14171	4.28895	2.37285	1.86488
Alcohols	n-Butanol	35.4341	18.4634	339.41	181.555	175.035	91.0936	37.2768	25.5767	28.4394	7.70828	110.773	38.5623	161.491	92.7746	207.517	121.316
	1-Pentanol	3.14951	1.52123	28.5623	5.65353	12.3775	5.19922	4.82147	3.25164	2.61235	0.849711	7.05048	2.39678	14.831	4.85581	10.0529	2.90836
	1-Hexanol	0.851918	0.361629	9.61687	5.03211	13.0146	6.50549	15.6996	12.2797	1.72297	1.32931	1.59033	0.481271	15.4091	7.98314	21.5513	11.6051
	1-Heptanol	0.0235385	0.0140877	0.1573	0.0681934	0.0920397	0.0436571	0.276193	0.15931	0.0135099	0.00405913	0.00945082	0	0.00956678	0.000115954	0.168282	0.0971723
	iso-Butyl alcohol	0.226346	0.0979671	1.93374	1.74722	0.915885	0.383553	1.43105	0.771239	0.113753	0.0523482	0.0231279	0.0209588	0.312526	0.155843	0.719641	0.454054
	sec-Butyl alcohol	0.268345	0.0933043	1.69405	0.813409	4.14003	2.43982	3.29958	2.20273	0.0959255	0.0476276	3.90703	2.85096	5.48763	2.41032	12.0545	7.7832
	iso-Pentyl alcohol	0.103866	0.0504413	1.08004	0.409152	0.804623	0.310605	0.497001	0.306973	0.12609	0.0425751	0.512525	0.214474	2.17265	0.737835	1.09889	0.172094
	2-Ethyl -1-hexanol	0.36566	0.0562399	0.563241	0.0727198	0.474894	0.0818806	0.485813	0.0563473	0.354295	0.0415115	0.616217	0.111456	0.485072	0.0567746	0.621411	0.185824
	2-Phenyl ethanol	0.0882615	0.0245467	0.467078	0.0858388	0.635748	0.0980212	0.270787	0.0911532	0.0613774	0.0117939	0.209688	0.0770402	0.767777	0.187778	0.6454	0.200385
	3-Phenyl-1-propanol	0.00524807	0.00307902	0.0960485	0.0369089	0.114778	0.0521913	0.0541048	0.0293937	0.0036014	0.00143235	0.0048765	0.00270745	0.011225	0.00447749	0.0418136	0.0126161
Phenolic & aromatic	Phenol	0.449091	0.20267	1.12073	0.288958	3.08867	0.877845	5.09572	1.50872	0.310799	0.105009	0.506027	0.19656	1.38127	0.938023	1.89886	0.49261
	p-Cresol	1.34892	0.410211	10.2387	2.46052	17.9427	5.13762	15.0321	4.13172	1.24705	0.441887	1.95972	0.585388	3.58141	1.37316	8.4026	3.08069
	Indole	0.0560203	0.0216064	0.508718	0.263247	0.368505	0.19479	0.638821	0.314914	0.0297834	0.0157304	0.0336112	0.0180602	0.260166	0.235543	0.529713	0.112223
	Skatole	0.00725131	0.0048295	0.136039	0.0570799	0.665883	0.308618	0.398724	0.0934631	0.0065216	0.00541211	0.00157664	0.00125543	0.00193284	0.0011325	0.174352	0.114821
	p-Xylene	0.265458	0.142882	0.0413926	0.00249671	0.191793	0.148639	0.157594	0.120167	0.149981	0.109794	0.0383037	0.00463224	0.331806	0.180894	0.327168	0.189379
Sulfuric	Dimethyl disulfide	0.973321	0.3152	19.4492	5.44939	18.5697	6.32269	12.2857	4.62107	0.291463	0.1115	0.642814	0.310269	8.77642	6.50721	14.2468	4.34168
	Dimethyl trisulfide	0.0355632	0.0168534	1.2173	0.461086	0.936658	0.343736	1.08538	0.296836	0.00874485	0.00248513	0.0174115	0.00924205	0.126754	0.0613339	0.89003	0.335576
Aldehydes	Octanal	0.0697656	0.0101707	0.0324331	0.010764	0.0431697	0.00705511	0.0524793	0.0220708	0.067854	0.0159358	5.42178	5.31458	0.165487	0.121296	0.0542889	0.0155198
	Nonanal	0.878301	0.172213	0.491127	0.108062	0.54164	0.109503	0.805511	0.247778	0.883809	0.208801	0.735804	0.322183	0.524023	0.105444	0.748456	0.239044
	Decanal	0.0750012	0.0221921	0.0245563	0.00918959	0.0233442	0.00892587	0.0640595	0.0252283	0.0878405	0.0378695	0.123036	0.0780442	0.0186909	0.00835406	0.037662	0.0211523

## Sheet: Table S3
A. Day 0
	Compound		Day 0
		Odor	CB		PB		CA		PA
		threshold	Conc	OAV	Conc	OAV	Conc	OAV	Conc	OAV
		(mg m-3)+	(mg m-3)		(mg m-3)		(mg m-3)		(mg m-3)
Volatile fatty acids	Acetic acid	577.89	102.17	0.176798	199.17	0.34465	119.49	0.206769	142.78	0.247071
	Propanoic acid	76.16	87.73	1.15192	264.99	3.47939	96.04	1.26103	139.85	1.83627
	2-Methyl propanoic acid	37.75	5.92	0.156821	10.93	0.289536	5.43	0.143841	6.36	0.168477
	Butanoic acid	6.94	103.34	14.8905	386.83	55.7392	163.76	23.5965	186.24	26.8357
	3-Methyl butanoic acid	2.3	2.31	1.00435	4.19	1.82174	2.28	0.991304	2.62	1.13913
	Pentanoic acid	8.81	4.63	0.525539	11.91	1.35187	9.84	1.11691	9.13	1.03632
	4-Methyl pentanoic acid	37	0.37	0.01	0.41	0.0110811	0.51	0.0137838	0.65	0.0175676
	Hexanoic acid	69.45	6.25	0.0899928	34.93	0.502952	18.95	0.272858	14.78	0.212815
	Heptanoic acid	60.17	0.01	0.000166196	0.01	0.000166196	0.02	0.000332392	0.02	0.000332392
	Octanoic acid	12.49	0.56	0.0448359	0.51	0.0408327	0.64	0.051241	0.62	0.0496397
	Nonanoic acid	15.49	0.6	0.0387347	0.45	0.029051	0.61	0.0393802	0.57	0.0367979
	Decanoic acid	50	0.43	0.0086	0.36	0.0072	0.58	0.0116	0.48	0.0096
	SUM		314.32	18.0982	914.69	63.6177	418.15	27.7056	504.1	31.5898
Esters	Ethyl hexanoate	15	0.03	0.002	0.9	0.06	0.32	0.0213333	0.19	0.0126667
	Hexyl hexanoate	2917.19	0.04	1.37118e-05	0.73	0.000250241	0.3	0.000102839	0.18	6.17032e-05
	SUM		0.07	0.00201371	1.63	0.0602502	0.62	0.0214362	0.37	0.0127284
Alcohols	n-Butanol	123	85.67	0.696504	122.44	0.995447	136.42	1.10911	109.49	0.890163
	1-Pentanol	1558.54	6.34	0.00406791	5.54	0.00355461	12.13	0.00778293	10.06	0.00645476
	1-Hexanol	673.87	1.19	0.00176592	2.07	0.00307181	3.28	0.00486741	6.63	0.00983869
	1-Heptanol	490.92	0.04	8.14797e-05	0.04	8.14797e-05	0.09	0.000183329	0.05	0.00010185
	iso-Butyl alcohol	5432.51	0.72	0.000132535	0.39	7.179e-05	0.87	0.000160147	0.44	8.09939e-05
	sec-Butyl alcohol	123	0.37	0.00300813	0.53	0.00430894	1.03	0.00837398	0.37	0.00300813
	iso-Pentyl alcohol	89.44	0.37	0.00413685	1.33	0.0148703	0.4	0.00447227	0.49	0.00547853
	2-Ethyl -1-hexanol	400	1.31	0.003275	1.64	0.0041	1.41	0.003525	1.36	0.0034
	2-Phenyl ethanol	27.91	0.22	0.00788248	0.3	0.0107488	0.344	0.0123253	0.24	0.00859907
	3-Phenyl-1-propanol	420	0.01	2.38095e-05	0.01	2.38095e-05	0.02	4.7619e-05	0.01	2.38095e-05
	SUM		96.24	0.720878	134.29	1.03628	155.994	1.15084	129.14	0.927148
Phenolic & Aromatic	Phenol	206.09	0.68	0.00329953	0.89	0.0043185	1.73	0.00839439	1.2	0.0058227
	p-Cresol	1.28	18.26	14.2656	12.35	9.64844	5.19	4.05469	4.8	3.75
	Indole	2.06	3.04	1.47573	0.62	0.300971	0.22	0.106796	0.11	0.0533981
	Skatole	0.48	0	0	0.01	0.0208333	0.03	0.0625	0.03	0.0625
	p-Xylene	2183.09	0.19	8.70326e-05	0.17	7.78713e-05	1.02	0.000467228	0.58	0.000265678
	SUM		22.17	15.7447	14.04	9.97464	8.19	4.23285	6.72	3.87199
Sulfuric	Dimethyl disulfide	12.21	18.31	1.49959	5.75	0.470925	3.75	0.307125	1.12	0.0917281
	Dimethyl trisulfide	6.2	0.9	0.145161	0.14	0.0225806	0.14	0.0225806	0.03	0.00483871
	SUM		19.21	1.64475	5.89	0.493506	3.89	0.329706	1.15	0.0965668
Aldehydes	Octanol	15.99	0.24	0.0150094	0.32	0.0200125	0.27	0.0168856	0.26	0.0162602
	Nonanol	59.15	3.43	0.0579882	3.95	0.0667794	3.38	0.0571429	3.4	0.057481
	Decanol	440	0.34	0.000772727	0.3	0.000681818	0.289	0.000656818	0.34	0.000772727
	SUM		4.01	0.0737703	4.57	0.0874737	3.939	0.0746852	4	0.0745139
	SUM		456.02	36.2844	1075.11	75.2698	590.783	33.5151	645.48	36.5727
B. Day 7
	Compound		Day 7
		Odor	CB		PB		CA		PA
		threshold	Conc	OAV	Conc	OAV	Conc	OAV	Conc	OAV
		(mg m-3)+	(mg m-3)		(mg m-3)		(mg m-3)		(mg m-3)
Volatile fatty acids	Acetic acid	577.89	20.96	0.0362699	435.34	0.753327	2422.36	4.19173	7262.75	12.5677
	Propanoic acid	76.16	31.36	0.411765	127.7	1.67673	811.82	10.6594	1949.54	25.598
	2-Methyl propanoic acid	37.75	0.68	0.0180132	24.3	0.643709	54.15	1.43444	80.23	2.1253
	Butanoic acid	6.94	102.01	14.6988	398.82	57.4669	1152.88	166.121	2711.94	390.769
	3-Methyl butanoic acid	2.3	3.52	1.53043	7.36	3.2	16.92	7.35652	32.33	14.0565
	Pentanoic acid	8.81	4.34	0.492622	19.18	2.17707	86.09	9.77185	12.25	1.39047
	4-Methyl pentanoic acid	37	0.25	0.00675676	0.66	0.0178378	5.04	0.136216	7.32	0.197838
	Hexanoic acid	69.45	2.74	0.0394528	8.23	0.118503	43.08	0.620302	137.87	1.98517
	Heptanoic acid	60.17	0.05	0.000830979	0.04	0.000664783	0.01	0.000166196	0.68	0.0113013
	Octanoic acid	12.49	0.39	0.031225	0.6	0.0480384	0.62	0.0496397	2.64	0.211369
	Nonanoic acid	15.49	0.43	0.0277598	0.47	0.0303422	0.67	0.0432537	1.58	0.102001
	Decanoic acid	50	0.44	0.0088	0.37	0.0074	0.69	0.0138	1.07	0.0214
	SUM		167.17	17.3028	1023.07	66.1405	4594.33	200.398	12200.2	449.036
Esters	Ethyl hexanoate	15	1.33	0.0886667	0.24	0.016	3	0.2	5.42	0.361333
	Hexyl hexanoate	2917.19	1.06	0.000363363	0.23	7.8843e-05	2.2	0.00075415	3.93	0.00134719
	SUM	2932.19	2.39	0.08903	0.47	0.0160788	5.2	0.200754	9.35	0.362681
Alcohols	n-Butanol	123	997.08	8.10634	768.75	6.25	1306.73	10.6238	426.48	3.46732
	1-Pentanol	1558.54	107.62	0.0690518	111.46	0.0715156	109.96	0.0705532	27.14	0.0174137
	1-Hexanol	673.87	33.33	0.0494606	34.78	0.0516123	37.02	0.0549364	6.12	0.00908187
	1-Heptanol	490.92	0.32	0.000651837	0.43	0.000875906	0.61	0.00124256	0.04	8.14797e-05
	iso-Butyl alcohol	5432.51	7.51	0.00138242	2.13	0.000392084	7.44	0.00136953	0.09	1.65669e-05
	sec-Butyl alcohol	123	5.48	0.0445528	5.67	0.0460976	6.52	0.0530081	15.04	0.122276
	iso-Pentyl alcohol	89.44	4.95	0.0553444	9.25	0.103421	4.16	0.0465116	1.97	0.0220259
	2-Ethyl -1-hexanol	400	1.04	0.0026	1.22	0.00305	2.17	0.005425	2.37	0.005925
	2-Phenyl ethanol	27.91	3.53	0.126478	2.48	0.088857	1.8	0.064493	0.81	0.0290219
	3-Phenyl-1-propanol	420	0.08	0.000190476	0.13	0.000309524	0.37	0.000880952	0.02	4.7619e-05
	SUM		1160.94	8.45605	936.3	6.61613	1476.78	10.9222	480.08	3.67321
Phenolic & Aromatic	Phenol	206.09	42.33	0.205396	30.63	0.148624	4.31	0.0209132	1.95	0.00946189
	p-Cresol	1.28	49.76	38.875	55.55	43.3984	39.42	30.7969	7.54	5.89062
	Indole	2.06	10.78	5.23301	10.18	4.94175	1.96	0.951456	0.13	0.0631068
	Skatole	0.48	1.68	3.5	1.4	2.91667	0.52	1.08333	0.01	0.0208333
	p-Xylene	2183.09	1.55	0.000710003	1.68	0.000769551	0.16	7.32906e-05	0.15	6.87099e-05
	SUM		106.1	47.8141	99.44	51.4062	46.37	32.8527	9.78	5.9841
Sulfuric	Dimethyl disulfide	12.21	66.82	5.47256	43.22	3.53972	74.8	6.12613	2.47	0.202293
	Dimethyl trisulfide	6.2	13.4	2.16129	7.31	1.17903	4.69	0.756452	0.07	0.0112903
	SUM		80.22	7.63385	50.53	4.71875	79.49	6.88258	2.54	0.213584
Aldehydes	Octanol	15.99	0.07	0.00437774	0.09	0.00562852	0.12	0.00750469	20.87	1.30519
	Nonanol	59.15	1.1	0.0185968	0.9	0.0152156	1.89	0.0319527	2.83	0.0478445
	Decanol	440	0.06	0.000136364	0.03	6.81818e-05	0.09	0.000204545	0.47	0.00106818
	SUM		1.23	0.0231109	1.02	0.0209123	2.1	0.0396619	24.17	1.3541
	SUM		1518.05	81.3189	2110.83	128.919	6204.27	251.296	12726.1	460.624
C. Day 14
	Compound		Day 14
		Odor	CB		PB		CA		PA
		threshold	Conc	OAV	Conc	OAV	Conc	OAV	Conc	OAV
		(mg m-3)+	(mg m-3)		(mg m-3)		(mg m-3)		(mg m-3)
Volatile fatty acids	Acetic acid	577.89	15.82	0.0273755	17.51	0.0302999	233.66	0.404333	2359.11	4.08228
	Propanoic acid	76.16	39.91	0.524028	26.72	0.35084	131.222	1.72298	1291.35	16.9558
	2-Methyl propanoic acid	37.75	28.63	0.758411	26.35	0.698013	31.09	0.823576	116.85	3.09536
	Butanoic acid	6.94	196.56	28.3228	103.49	14.9121	623.46	89.8357	2183.76	314.663
	3-Methyl butanoic acid	2.3	11.2	4.86957	15.15	6.58696	9.4	4.08696	36.75	15.9783
	Pentanoic acid	8.81	10.15	1.1521	8.5	0.964813	52.16	5.92054	83.05	9.42679
	4-Methyl pentanoic acid	37	0.68	0.0183784	0.17	0.00459459	5.51	0.148919	7.43	0.200811
	Hexanoic acid	69.45	21.38	0.307847	17.16	0.247084	153.84	2.21512	155.82	2.24363
	Heptanoic acid	60.17	0.08	0.00132957	0.05	0.000830979	0.41	0.00681403	0.56	0.00930696
	Octanoic acid	12.49	1.07	0.0856685	1.04	0.0832666	1.85	0.148118	1.49	0.119295
	Nonanoic acid	15.49	1.14	0.0735959	1.16	0.074887	1.49	0.0961911	1.13	0.0729503
	Decanoic acid	50	0.91	0.0182	0.91	0.0182	1.21	0.0242	0.63	0.0126
	SUM		327.53	36.1593	218.21	23.9719	1245.3	105.433	6237.93	366.86
Esters	Ethyl hexanoate	15	0.03	0.002	1.49	0.0993333	26.88	1.792	32.18	2.14533
	Hexyl hexanoate	2917.19	0.04	1.37118e-05	1.17	0.000401071	16.5	0.00565613	19.8	0.00678735
	SUM		0.07	0.00201371	2.66	0.0997344	43.38	1.79766	51.98	2.15212
Alcohols	n-Butanol	123	182.5	1.48374	212.91	1.73098	673.89	5.47878	621.74	5.0548
	1-Pentanol	1558.54	115.26	0.0739538	98.34	0.0630975	47.65	0.0305735	57.1	0.0366369
	1-Hexanol	673.87	171.9	0.255094	181.69	0.269622	50.11	0.0743615	59.33	0.0880437
	1-Heptanol	490.92	2.09	0.00425731	3.6	0.00733317	0.35	0.000712947	0.04	8.14797e-05
	iso-Butyl alcohol	5432.51	1.19	0.000219052	0.39	7.179e-05	3.53	0.000649792	1.2	0.000220892
	sec-Butyl alcohol	123	0.08	0.000650407	0	0	15.94	0.129593	21.13	0.171789
	iso-Pentyl alcohol	89.44	5.61	0.0627236	4.99	0.0557916	3.1	0.0346601	8.36	0.0934705
	2-Ethyl -1-hexanol	400	1.52	0.0038	1.522	0.003805	1.83	0.004575	1.87	0.004675
	2-Phenyl ethanol	27.91	3.47	0.124328	3.61	0.129344	2.45	0.0877822	2.96	0.106055
	3-Phenyl-1-propanol	420	0.19	0.000452381	0.23	0.000547619	0.4	0.000952381	0.04	9.52381e-05
	SUM		483.81	2.00922	507.282	2.26059	799.25	5.84264	773.77	5.55586
Phenolic & Aromatic	Phenol	206.09	47.52	0.230579	41.56	0.201659	11.89	0.0576932	5.32	0.025814
	p-Cresol	1.28	55.55	43.3984	72.59	56.7109	69.08	53.9688	13.79	10.7734
	Indole	2.06	4.41	2.14078	6.94	3.36893	1.42	0.68932	1	0.485437
	Skatole	0.48	0.98	2.04167	2.74	5.70833	2.56	5.33333	0.01	0.0208333
	p-Xylene	2183.09	0.24	0.000109936	0.18	8.24519e-05	0.74	0.000338969	1.28	0.000586325
	SUM		108.7	47.8116	124.01	65.9899	85.69	60.0494	21.4	11.3061
Sulfuric	Dimethyl disulfide	12.21	68.59	5.61753	57.96	4.74693	71.49	5.85504	33.79	2.7674
	Dimethyl trisulfide	6.2	18.35	2.95968	7.14	1.15161	3.61	0.582258	0.49	0.0790323
	SUM		86.94	8.5772	65.1	5.89854	75.1	6.43729	34.28	2.84644
Aldehydes	Octanol	15.99	0.43	0.0268918	0.15	0.00938086	0.17	0.0106316	0.64	0.040025
	Nonanol	59.15	5.44	0.0919696	2.63	0.0444632	2.09	0.0353339	2.02	0.0341505
	Decanol	440	0.27	0.000613636	0.13	0.000295455	0.09	0.000204545	0.07	0.000159091
	SUM		6.14	0.119475	2.91	0.0541395	2.35	0.0461701	2.73	0.0743346
	SUM		1013.19	94.6787	920.172	98.2748	2251.07	179.607	7122.09	388.795
D. Day 30
	Compound		Day 30
		Odor	CB		PB		CA		PA
		threshold	Conc	OAV	Conc	OAV	Conc	OAV	Conc	OAV
		(mg m-3)+	(mg m-3)		(mg m-3)		(mg m-3)		(mg m-3)
Volatile fatty acids	Acetic acid	577.89	10.93	0.0189136	47.44	0.0820917	60.64	0.104933	82.15	0.142155
	Propanoic acid	76.16	6.91	0.09073	35.8	0.470063	37.14	0.487658	187.57	2.46284
	2-Methyl propanoic acid	37.75	2.83	0.0749669	17.72	0.469404	5.9	0.156291	84.91	2.24927
	Butanoic acid	6.94	16.51	2.37896	90.91	13.0994	66.23	9.54323	848.58	122.274
	3-Methyl butanoic acid	2.3	1.85	0.804348	8.38	3.64348	2.27	0.986957	3.33	1.44783
	Pentanoic acid	8.81	1.24	0.140749	9.3	1.05562	3.72	0.422247	91.27	10.3598
	4-Methyl pentanoic acid	37	0.05	0.00135135	0.55	0.0148649	0.27	0.0072973	1.55	0.0418919
	Hexanoic acid	69.45	3.79	0.0545716	10.51	0.151332	9.74	0.140245	265.15	3.81785
	Heptanoic acid	60.17	0.01	0.000166196	0.05	0.000830979	0.12	0.00199435	1.01	0.0167858
	Octanoic acid	12.49	0.49	0.0392314	0.62	0.0496397	1.22	0.0976781	1.76	0.140913
	Nonanoic acid	15.49	0.65	0.0419626	0.55	0.0355068	1.15	0.0742414	1.27	0.0819884
	Decanoic acid	50	0.64	0.0128	0.48	0.0096	1.11	0.0222	0.71	0.0142
	SUM		45.9	3.65875	222.31	19.0819	189.51	12.045	1569.26	143.049
Esters	Ethyl hexanoate	15	0.03	0.002	0.08	0.00533333	0.2	0.0133333	13.68	0.912
	Hexyl hexanoate	2917.19	0.04	1.37118e-05	0.08	2.74237e-05	0.18	6.17032e-05	9.14	0.00313315
	SUM		0.07	0.00201371	0.16	0.00536076	0.38	0.013395	22.82	0.915133
Alcohols	n-Butanol	123	16.56	0.134634	229.67	1.86724	143.52	1.16683	798.94	6.49545
	1-Pentanol	1558.54	3.23	0.00207245	41.39	0.0265569	18.56	0.0119086	38.7	0.0248309
	1-Hexanol	673.87	6.07	0.00900767	74.69	0.110837	60.44	0.0896909	82.97	0.123125
	1-Heptanol	490.92	0.19	0.000387028	2.82	0.00574432	1.06	0.00215921	0.647884	0.00131973
	iso-Butyl alcohol	5432.51	0.97	0.000178555	4.78	0.000879888	5.51	0.00101426	2.77	0.000509893
	sec-Butyl alcohol	123	0.01	8.13008e-05	4.7	0.0382114	12.7	0.103252	46.41	0.377317
	iso-Pentyl alcohol	89.44	1.22	0.0136404	2.48	0.0277281	1.91	0.0213551	4.23	0.0472943
	2-Ethyl -1-hexanol	400	1.68	0.0042	1.17	0.002925	1.87	0.004675	2.39	0.005975
	2-Phenyl ethanol	27.91	0.5	0.0179147	2.11	0.0756001	1.04	0.0372626	2.48	0.088857
	3-Phenyl-1-propanol	420	0.02	4.7619e-05	0.41	0.00097619	0.21	0.0005	0.16	0.000380952
	SUM		30.45	0.182164	364.22	2.1567	246.82	1.43865	979.698	7.16506
Phenolic & Aromatic	Phenol	206.09	15.05	0.0730263	35.72	0.173322	19.62	0.0952011	7.31	0.0354699
	p-Cresol	1.28	15.25	11.9141	84.27	65.8359	57.87	45.2109	32.35	25.2734
	Indole	2.06	0.69	0.334951	7.88	3.82524	2.46	1.19417	2.04	0.990291
	Skatole	0.48	0.18	0.375	5.52	11.5	1.54	3.20833	0.67	1.39583
	p-Xylene	2183.09	0.72	0.000329808	1.42	0.000650454	0.61	0.00027942	1.26	0.000577164
	SUM		31.89	12.6974	134.81	81.3352	82.1	49.7089	43.63	27.6956
Sulfuric	Dimethyl disulfide	12.21	7.68	0.628993	26.62	2.18018	47.3	3.87387	54.85	4.49222
	Dimethyl trisulfide	6.2	1.34	0.216129	5.26	0.848387	4.18	0.674194	3.43	0.553226
	SUM		9.02	0.845122	31.88	3.02857	51.48	4.54807	58.28	5.04545
Aldehydes	Octanol	15.99	0.23	0.014384	0.15	0.00938086	0.2	0.0125078	0.21	0.0131332
	Nonanol	59.15	4.07	0.0688081	2.07	0.0349958	3.1	0.0524091	2.88	0.0486898
	Decanol	440	0.39	0.000886364	0.13	0.000295455	0.25	0.000568182	0.14	0.000318182
	SUM		4.69	0.0840785	2.35	0.0446721	3.55	0.0654851	3.23	0.0621412
	SUM		122.02	17.4695	755.73	105.652	573.84	67.8195	2676.92	183.933
